# Supplementary material
Source: PubMed Central journal article supplement (PMC6702070)

**Supplemental Figure 1. Laminar targeting of the vessel layers is intact in *Kctd7* mutant animals.**

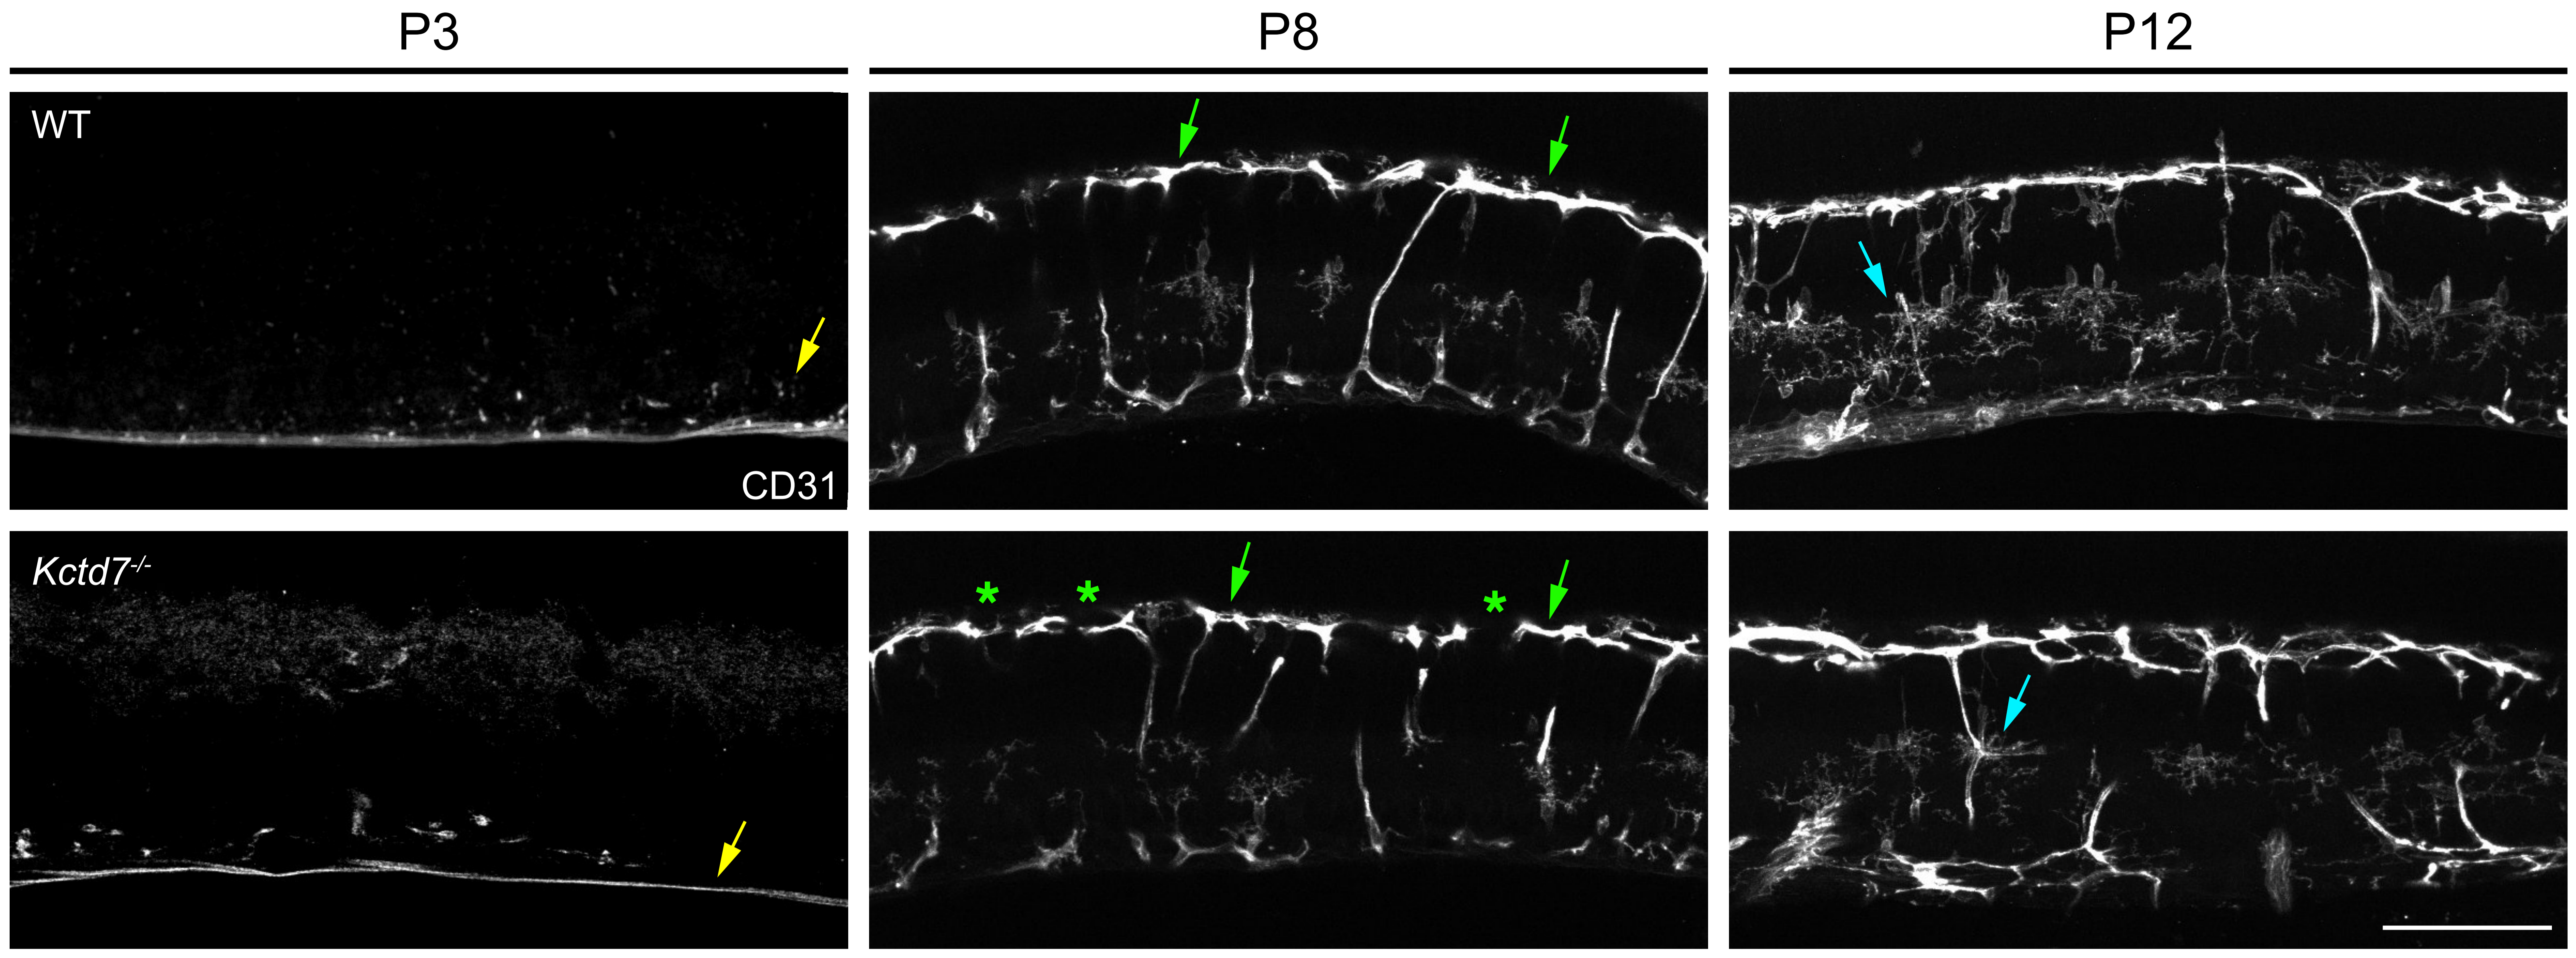

Supplement: NIHMS1531978-supplement-4.pdf [file NIHMS1531978-supplement-4.pdf]
